# Supplementary material for: Genomic–transcriptomic evolution in lung cancer and metastasis
Source: PubMed Central journal article supplement (PMC10115639; doi:10.1038/s41586-023-05706-4), 2023-04-12

**Supplementary information**

---

**Genomic–transcriptomic evolution in lung cancer and metastasis**

---

In the format provided by the authors and unedited

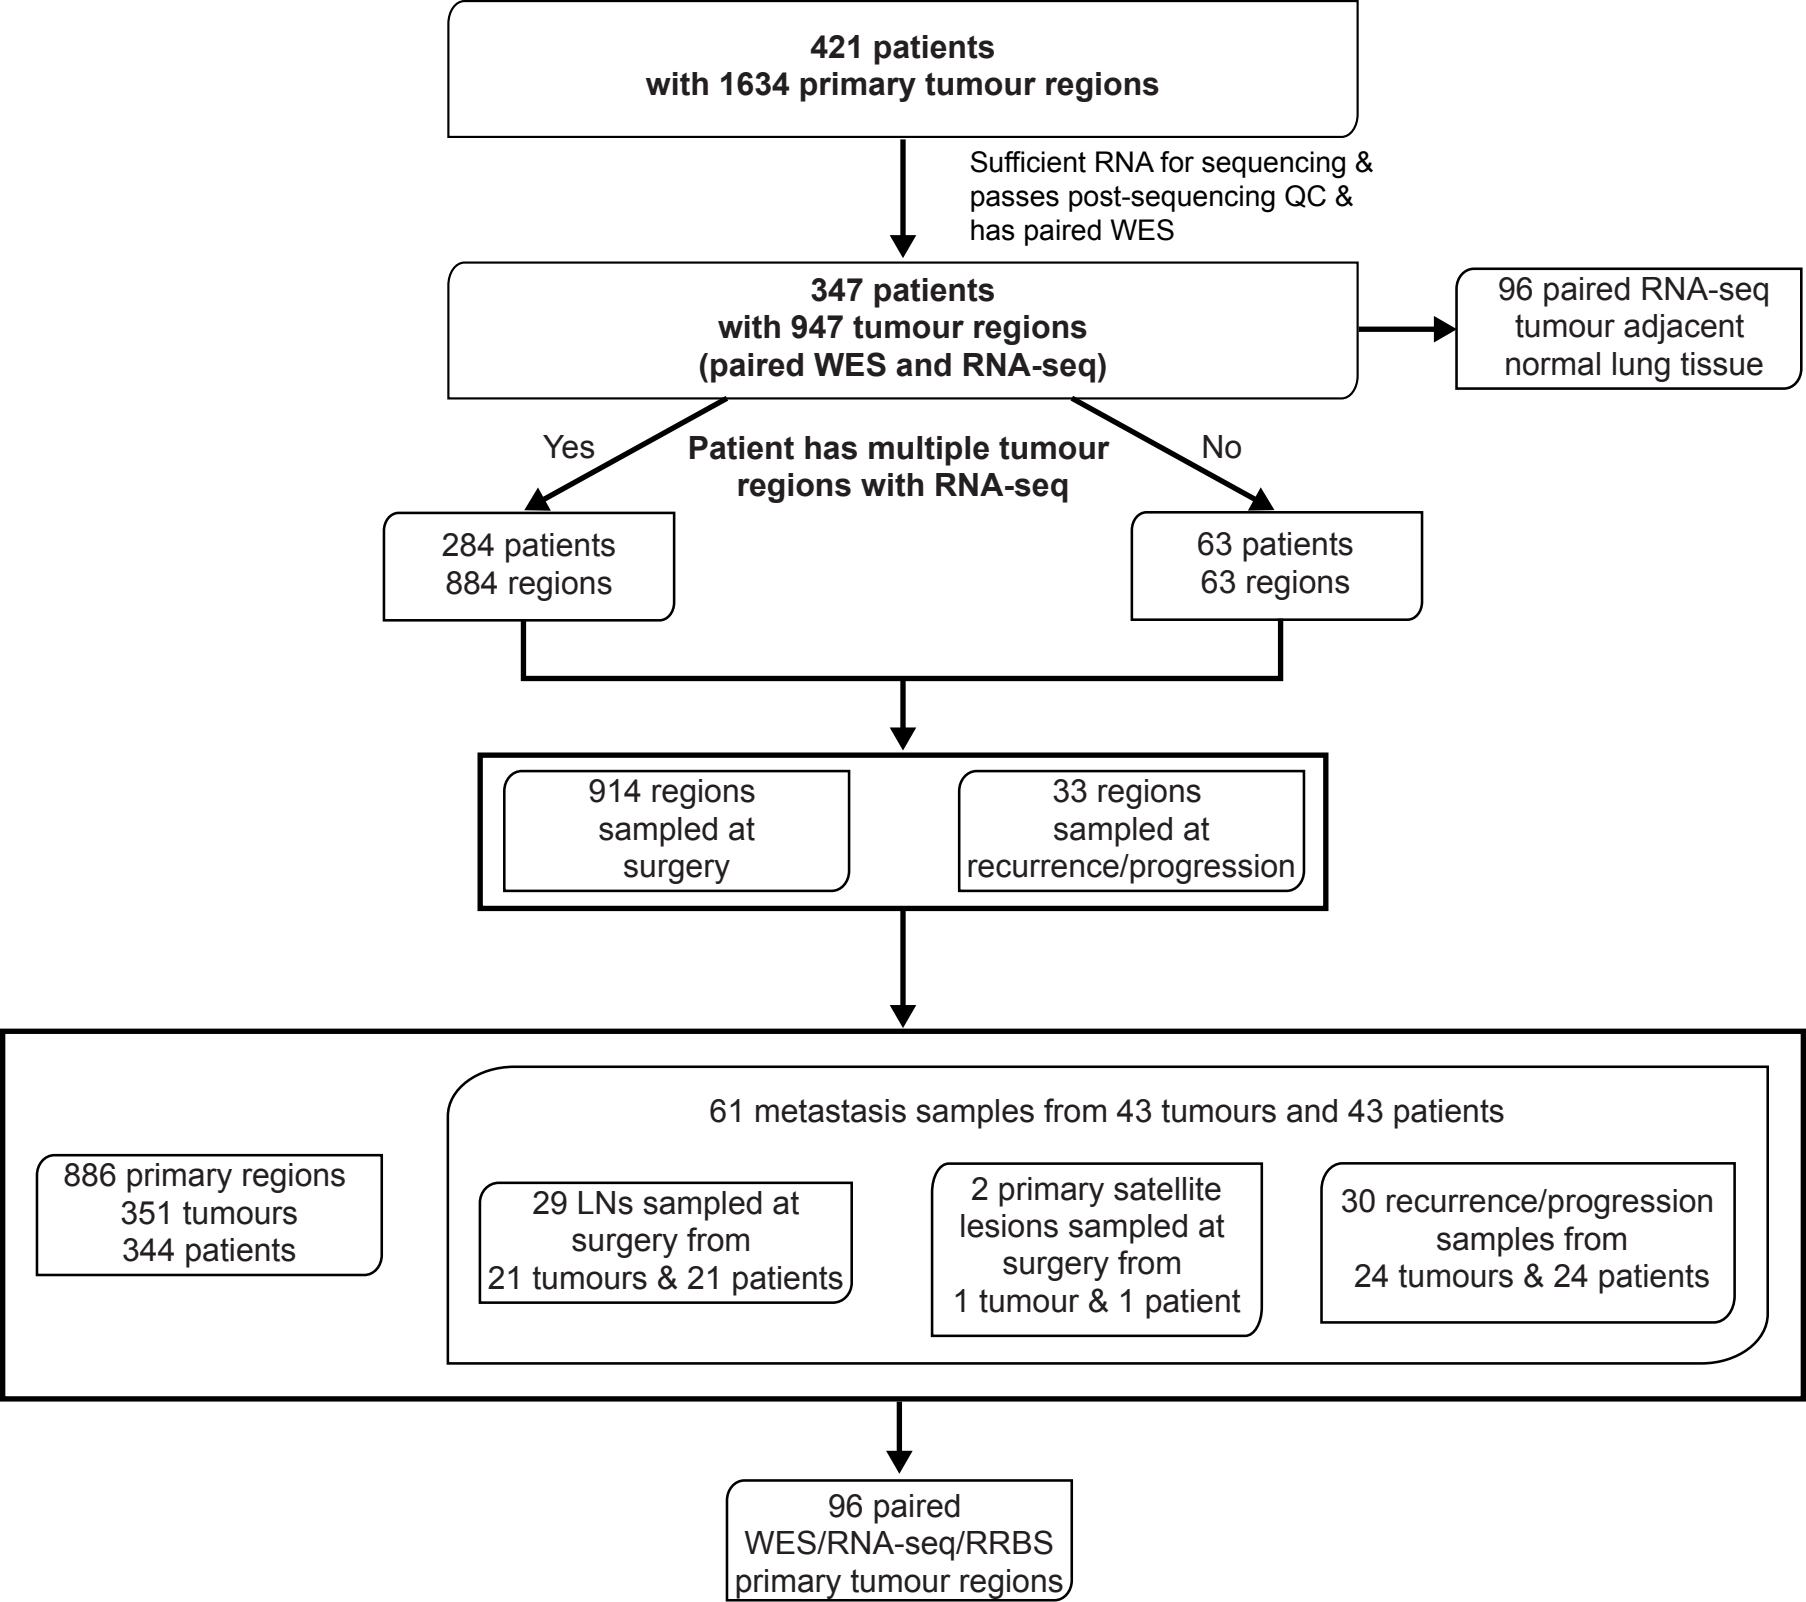

Supplement: 41586_2023_5706_MOESM1_ESM.pdf [file 41586_2023_5706_MOESM1_ESM.pdf]
